# Supplementary material for: Skeletal Lipocalin-2 Is Associated with Iron-Related Oxidative Stress in ob/ob Mice with Sarcopenia
Source: MDPI journal article supplement (doi:10.3390/antiox10050758), 2021-05-11
Supplement: s1 [file s1]

# Skeletal Lipocalin-2 is Associated with Iron-Related Oxidative Stress in ob/ob Mice with Sarcopenia

Eun Bee Choi <sup>1</sup>, Jae Hun Jeong <sup>1</sup>, Hye Min Jang <sup>1</sup>, Yu Jeong Ahn <sup>1</sup>, Kyu Hyeon Kim <sup>2</sup>,  
Hyeong Seok An <sup>1</sup>, Jong Youl Lee <sup>1</sup>, Eun Ae Jeong <sup>1</sup>, Jaewoong Lee <sup>1</sup>, Hyun Joo Shin <sup>1</sup>,  
Kyung Eun Kim<sup>1</sup> and Gu Seob Roh <sup>1,\*</sup>

<sup>1</sup>Department of Anatomy and Convergence Medical Science, Bio Anti-aging Medical Research Center, Institute of Health Sciences, College of Medicine, Gyeongsang National University, Jinju, Gyeongnam 52777, Republic of Korea; dmsql2274@naver.com (E.B.C.); wogns3764@gmail.com (J.H.J.); gpals759@naver.com (H.M.J.); ahnujung@naver.com (Y.J.A.); gudtjr5287@hanmail.net (H.S.A.); jyv7874v@naver.com (J.Y.L.); jeasky44@naver.com (E.A.J.); woongs1111@gmail.com (J.L.); k4900@hanmail.net (H.J.S.); kke-jws@hanmail.net (K.E.K.)

<sup>2</sup>Department of Medicine, College of Medicine, Gyeongsang National University, Jinju, Gyeongnam 52777, Republic of Korea; kyuhyeunkim@gmail.com (K.H.K.)

\* Correspondence: anaroh@gnu.ac.kr (G.S.R.); Tel.: +82-55-772-8035; Fax: +82-55-772-8039

**Supplementary Table S1. List of qRT-PCR primers.**

| Gene name                      | Primer sequences                                                                                                                     |
|--------------------------------|--------------------------------------------------------------------------------------------------------------------------------------|
| <i>Telomere (telg)</i>         | Forward 5' ACA CTA AGG TTT GGG TTT GGG TTT GGG TTA GTG T 3'<br>Reverse 5' TGT TAG GTA TCC CTA TCC CTA TCC CTA TCC CTA TCC CTA ACA 3' |
| <i>36b4d</i>                   | Forward 5' ACT GGT CTA GGA CCC GAG AAG 3'<br>Reverse 5' TCA ATG GTG CCT CTG GAG ATT 3'                                               |
| <i>TNF <math>\alpha</math></i> | Forward 5' CCA GAC CCT CAC ACT CAG ATC 3'<br>Reverse 5' CAC TTG GTG GTT TGC TAC GAC 3'                                               |
| <i>IL-6</i>                    | Forward 5' AGT TGC CTT CTT GGG ACT GA 3'<br>Reverse 5' TCC ACG ATT TCC CAG AGA AC 3'                                                 |
| <i>Timp1</i>                   | Forward 5' CGG TGG GTG GAT GAG TAA TG 3'<br>Reverse 5' GGC TGC ACA GTG GAG AAT AA 3'                                                 |
| <i>Lrp5</i>                    | Forward 5' GGA TGG GCA AGA ACC TCT ATT 3'<br>Reverse 5' GTC AAG GTC TCT CCA CAC AAG 3'                                               |
| <i>HGF</i>                     | Forward 5' GGA CCA TGT GAG GGA GAT TAT G 3'<br>Reverse 5' ATA CCA GGA CGA TTT GGG ATG 3'                                             |
| <i>MMP3</i>                    | Forward 5' GGA CCA GGG ATT AAT GGA GAT G 3'<br>Reverse 5' TGA GCA GCA ACC AGG AAT AG 3'                                              |
| <i>LCN2</i>                    | Forward 5' GCCATGGAGAAGAACCTGAA 3'<br>Reverse 5' TTTCCAGGAAGTCACAGAGATG 3'                                                           |
| <i>24p3R</i>                   | Forward 5' TTG CAG GAA CTG GAG AAT ACC 3'<br>Reverse 5' GTT GGT GAA GCC CAG GAT AA 3'                                                |
| <i>Tnfrsf1a</i>                | Forward 5' GCT AGG TCT TTG CCT TCT ATC C 3'<br>Reverse 5' CTT TCC AGC CTT CTC CTC TTT 3'                                             |

**Supplementary Table S2. List of primary antibodies**

| <i>Antibody</i>      | <i>Company</i> | <i>Catalog No.</i> | <i>Dilution</i> | <i>Applications</i> | <i>Source</i> |
|----------------------|----------------|--------------------|-----------------|---------------------|---------------|
| Perilipin 2          | abcam          | ab52356            | 1:1,000, 1:200  | WB, IF              | Rabbit        |
| FOXO1                | Sigma          | #2880              | 1:1,000, 1:200  | WB, IF              | Rabbit        |
| MuRf1                | Santa Cruz     | sc-398608          | 1:1,000, 1:50   | WB, IF              | Mouse         |
| IL-6                 | Santa Cruz     | sc-57315           | 1:1,000         | WB                  | Mouse         |
| Nrf2                 | Santa Cruz     | sc-365949          | 1:1,000         | WB                  | Mouse         |
| NF-κBp65             | Santa Cruz     | sc-8008            | 1:1,000         | WB                  | Mouse         |
| NQO1                 | abcam          | ab34173            | 1:1,000         | WB                  | Rabbit        |
| HO-1                 | Stressgen      | SPA-895            | 1:1,000         | WB                  | Rabbit        |
| iNOS                 | Chemicon       | AB5384             | 1:1,000         | WB                  | Rabbit        |
| F4/80                | Santa Cruz     | sc-377009          | 1:1,000         | IHC                 | Mouse         |
| LCN2                 | R&D            | AF3508             | 1:1,000, 1:200  | WB, IF              | Goat          |
| 24p3R                | Millipore      | ABC846             | 1:1,000, 1:50   | WB, IF              | Rabbit        |
| DMT1                 | Santa Cruz     | sc-166884          | 1:1,000         | WB                  | Mouse         |
| Transferrin receptor | abcam          | ab84036            | 1:1,000         | WB                  | Rabbit        |
| Ferritin             | abcam          | ab75973            | 1:3,000, 1:200  | WB, IHC             | Rabbit        |
| Ferroportin          | abcam          | ab78066            | 1:1,000, 1:200  | WB, IF              | Rabbit        |
| Hepcidin             | Santa Cruz     | sc-100277          | 1:1,000, 1:150  | WB, IF              | Mouse         |
| p84                  | abcam          | ab487              | 1:3,000         | WB                  | Mouse         |
| GAPDH                | Sigma          | #97166             | 1:10,000        | WB                  | Mouse         |

WB, western blot; IF, immunofluorescence; IHC, immunohistochemistry

**Supplementary Table S3. Upregulated genes in the skeletal muscles of ob/ob mice (FDR < 0.001).**

| <b>Gene Symbol</b> | <b>Gene Info</b>                                       | <b>logFC</b> | <b>FDR</b> |
|--------------------|--------------------------------------------------------|--------------|------------|
| <b>Gzmb</b>        | granzyme B                                             | 5.94883      | -1.14366   |
| <b>Ccl3</b>        | chemokine (C-C motif) ligand 3                         | 5.083154     | 3.28E-05   |
| <b>Ccl5</b>        | chemokine (C-C motif) ligand 5                         | 3.640853     | 5.81E-06   |
| <b>Serpina3g</b>   | serine peptidase inhibitor, clade A, member 3G         | 2.861471     | 0.000494   |
| <b>Hck</b>         | hemopoietic cell kinase                                | 2.683933     | 1.38E-05   |
| <b>Timp1</b>       | tissue inhibitor of metalloproteinase 1                | 3.290359     | 7.6E-05    |
| <b>Hgf</b>         | hepatocyte growth factor                               | 3.269319     | 1.3E-06    |
| <b>Cav1</b>        | caveolin 1, caveolae protein                           | 2.751305     | 5.03E-05   |
| <b>Adipoq</b>      | adiponectin, C1Q and collagen domain containing        | 3.292517     | 0.000345   |
| <b>Anxa1</b>       | annexin A1                                             | 3.091036     | 3.51E-07   |
| <b>App</b>         | amyloid beta (A4) precursor protein                    | 2.890011     | 1.17E-07   |
| <b>Thbs1</b>       | thrombospondin 1                                       | 4.0075       | 2.15E-05   |
| <b>Angptl4</b>     | angiopoietin-like 4                                    | 3.79912      | 3.53E-07   |
| <b>Csf1r</b>       | colony stimulating factor 1 receptor                   | 2.13228      | 1.12E-06   |
| <b>Gnb1</b>        | guanine nucleotide binding protein (G protein), beta 1 | 1.705021     | 4.71E-05   |
| <b>Lrp1</b>        | low density lipoprotein receptor-related protein 1     | 2.094279     | 3.94E-05   |
| <b>Anxa5</b>       | annexin A5                                             | 1.929491     | 0.000577   |
| <b>Lrp5</b>        | low density lipoprotein receptor-related protein 5     | 1.300714     | 0.000151   |
| <b>Fcgr2b</b>      | Fc receptor, IgG, low affinity IIb                     | 1.940922     | 6.62E-07   |
| <b>Itga5</b>       | integrin alpha 5 (fibronectin receptor alpha)          | 1.413288     | 8.72E-05   |
| <b>Hmox1</b>       | heme oxygenase 1                                       | 2.750012     | 2.53E-08   |
| <b>Pf4</b>         | platelet factor 4                                      | 2.143487     | 2.39E-07   |
| <b>Igfbp3</b>      | insulin-like growth factor binding protein 3           | 2.457293     | 9.42E-08   |
| <b>Tnfrsf1a</b>    | tumor necrosis factor receptor superfamily, member 1a  | 1.92376      | 8.74E-05   |
| <b>Id3</b>         | inhibitor of DNA binding 3                             | 1.69551      | 0.000219   |
| <b>Cd44</b>        | CD44 antigen                                           | 2.241298     | 5.23E-05   |

|                 |                                                       |          |          |
|-----------------|-------------------------------------------------------|----------|----------|
| <b>Tnfrsf1b</b> | tumor necrosis factor receptor superfamily, member 1b | 2.230025 | 1.77E-05 |
| <b>Sfrp1</b>    | secreted frizzled-related protein 1                   | 1.467531 | 0.000209 |
| <b>Hmgcr</b>    | 3-hydroxy-3-methylglutaryl-Coenzyme A reductase       | 1.352907 | 0.000277 |
| <b>Tgfb1</b>    | transforming growth factor, beta 1                    | 1.922796 | 3.81E-05 |
| <b>Casp8</b>    | caspase 8                                             | 1.876036 | 0.000134 |
| <b>Irf5</b>     | interferon regulatory factor 5                        | 1.549624 | 0.000958 |
| <b>Mmp3</b>     | matrix metalloproteinase 3                            | 4.747169 | 7.34E-08 |
| <b>Lcn2</b>     | lipocalin 2                                           | 4.080692 | 1.15E-10 |
| <b>Plaur</b>    | plasminogen activator, urokinase receptor             | 3.258796 | 8.65E-09 |
| <b>Casp1</b>    | caspase 1                                             | 3.108692 | 1.32E-06 |
| <b>Src</b>      | Rous sarcoma oncogene                                 | 1.706963 | 1.52E-05 |

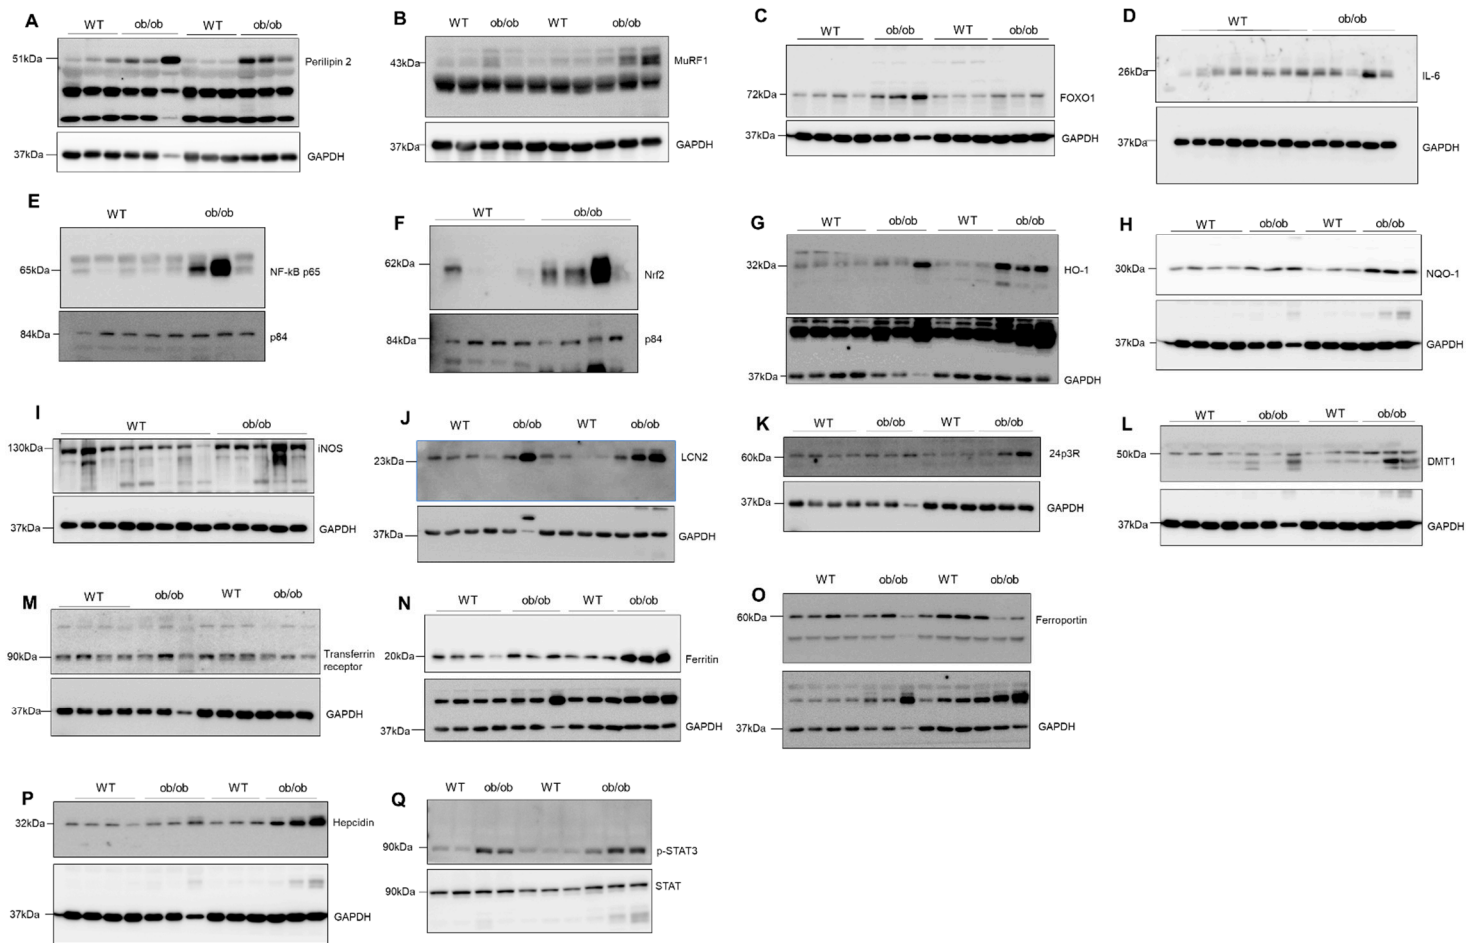

**Supplemental Figure S1. Uncropped images from all western blots.** (A-Q) figure 1D (A), figure 1H (B), figure 1I (C), figure 2D (D), figure 2F (E), figure 2G (F), figure 2H (G), figure 2I (H), figure 3C (I), figure 3D (J), figure 3D (K), figure 4C (L), figure 4D (M), figure 4E (N), figure 4G (O), figure 4H (P), and figure 4J (Q).

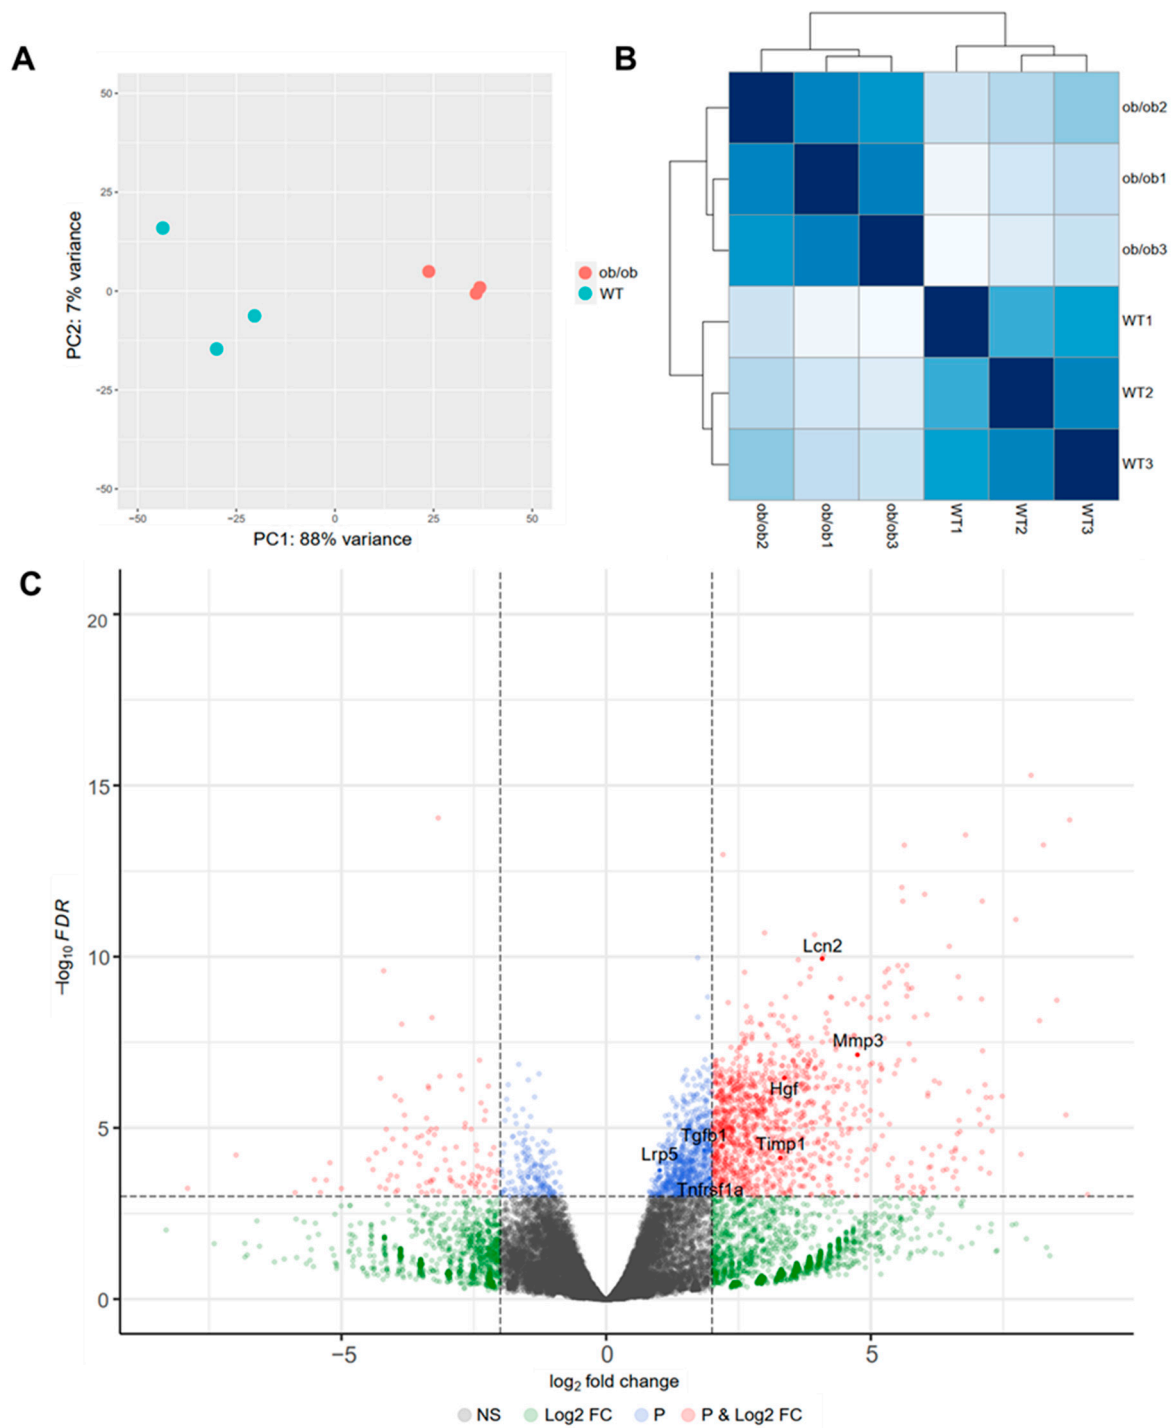

**Supplemental Figure S2. Next-generation sequencing–based RNA-seq analysis of skeletal muscles of wild-type (WT) and ob/ob mice.** (A) Principal component (PC) analysis, (B) gene correlation analysis, (C) Volcano-plot showing differentially expressed cell death–related genes as different-colored dots ( $P < 0.05$ ,  $\log_{2}FC > 2$ ).

A

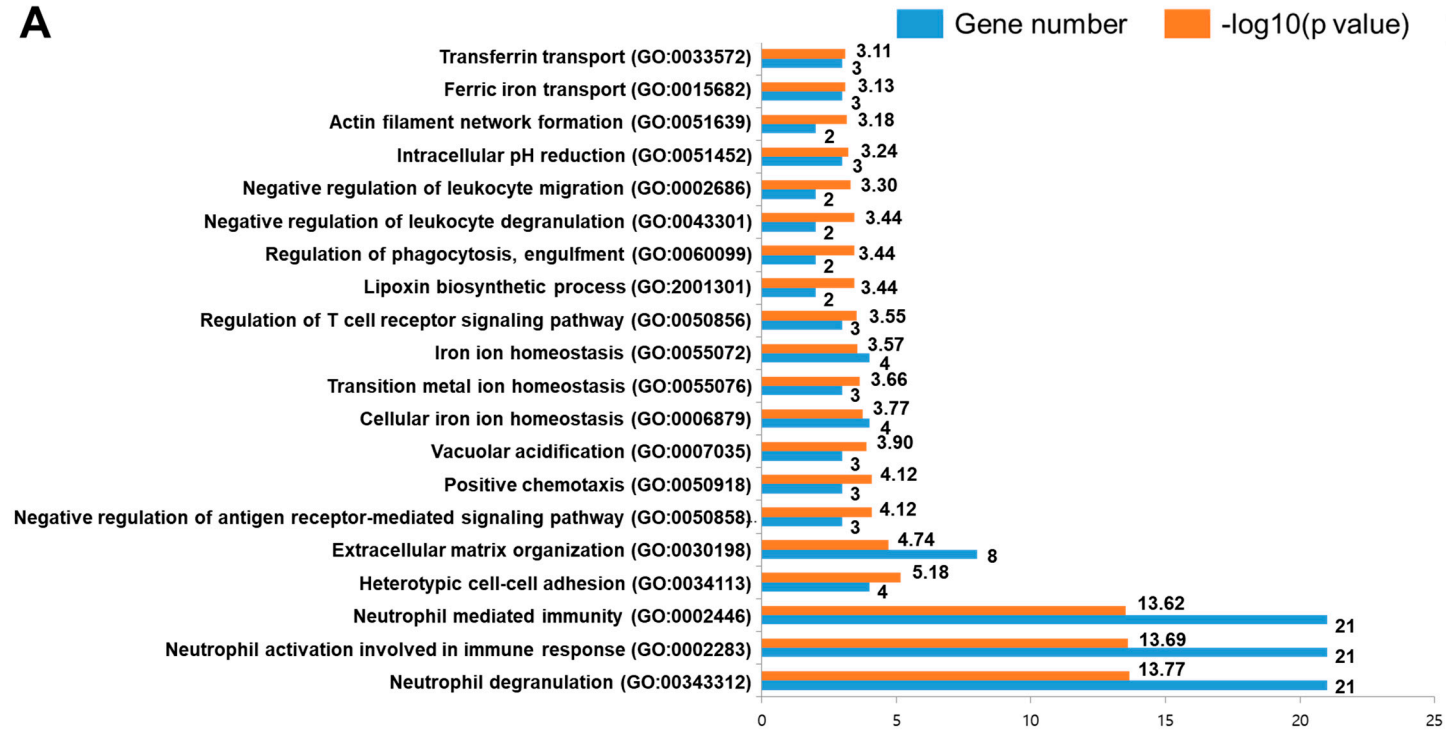



**B**

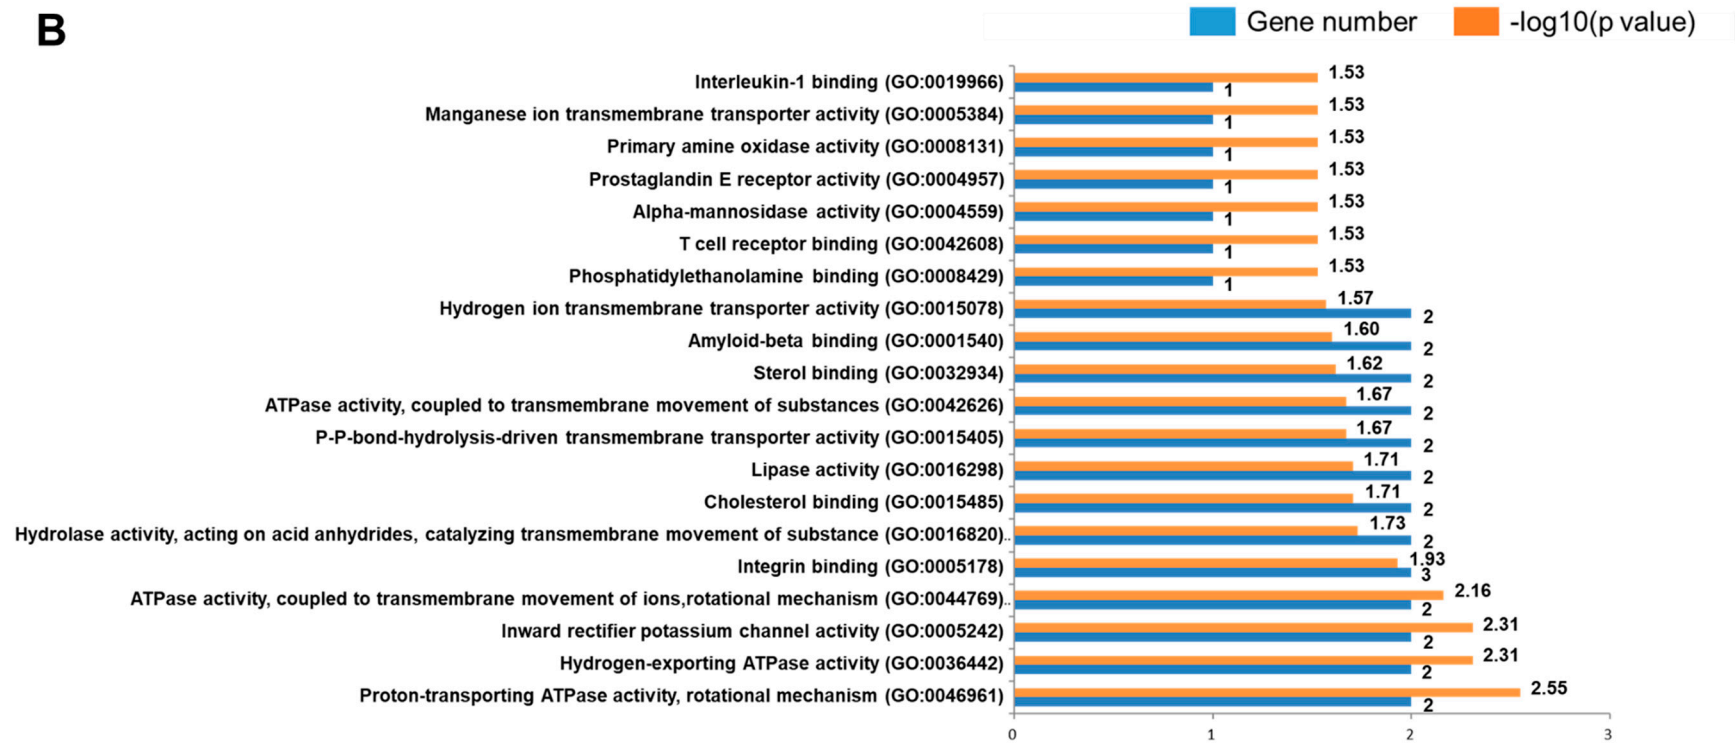

**C**

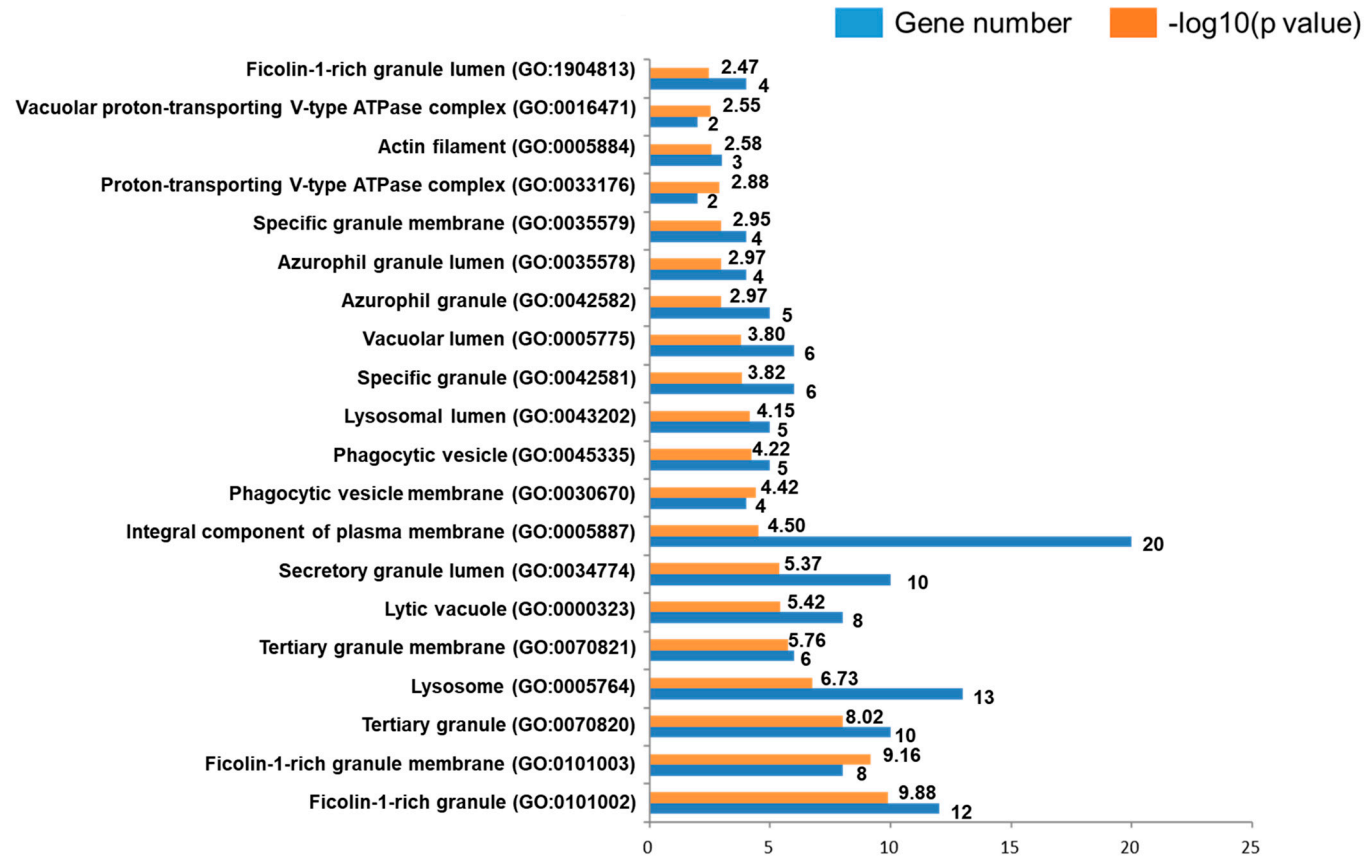

**Supplemental Figure S3. Enriched Gene Ontology (GO) terms identified using enrichment analysis in skeletal muscles of wild-type and ob/ob mice.** Only representative GO terms that include more than two sibling terms are displayed. (A–C) Biological process (A), Molecular function (B), Cellular component (C). Blue bars indicate the number of associated genes, and orange bars indicate  $-\log(P\text{-value})$  of the enrichment analysis.
